# Supplementary material for: Gastroduodenal artery aneurysm/ pseudoaneurysm: a systematic review of reported cases
Source: PeerJ journal article supplement (doi:10.7717/peerj.19115), 2025-03-17
Supplement: Raw_data_MKTEO.xlsx [file Raw_data_MKTEO.xlsx]

## Sheet: Included cases
		Characteristics								Presentation: Hemorrhage to					Obstruction					Diagnostic tools											Treatment						Prognosis
	Year	Author	Nation	Age	Gender: M(1)	Comorbidity	Predisposing factors	Size (cm)	Abdominal pain	GI	Intra-abdomen/ retroperitoneum	Pancreas	Biliary tract	Vessel	GI	Pancreas/ hyperamylasemia	Biliary tract	Vessel	Other presentation	Non-diagnostic ultrasound	Ultrasound	Non-diagnostic CT	CT	Angiography	Non-diagnostic ensoscopy	Endoscopy	MR	Other images	Additional vascular finding	shock before treatment	Emergent(1) / elective(0) Tx	Surgery	TAE/injection	Stent	Thrombin injection	Observation	successful stop bleeding	In hospital Mortality	Complication
1	2000	Serralta Serra A	Spain	44	0	renal transplantation	perforated duodenum ulcer s/p vagotomy, pyloroplasty billroth II	NA	0	0	1	0	0	0	0	0	0	0	0	0	0	1	0	1	0	0	0	0	0	1	1	1 for deuodenum bleeding	1	0	0	0	1	0	0
2	2000	Scesa JL(2)	France	45	1	Pancreatitis	pancreatitis	NA	1	0	0	0	0	0	0	0	0	0	0	0	0	0	1	1	0	0	0	0	0	0	0	0	1	0	0	0	1	0	0
3	2000	Konstantakos AK	USA	52	1	HTN, alcohol abuse	0	3	0	0	0	0	0	0	0	1	1	0	back pain	0	0	1	0	0	0	0	0	0	0	0	0	1 pancreaticoduodenectomy, choledochoduodenostomy	0	0	0	0	1	0	0
4	2000	Kuganeswaran E	USA	60	1	Pancreatitis, alcohol abuse	pancreatitis	5	1	1	0	1	1	0	0	1	0	0	0	0	0	0	1	1	0	0	0	ERCP	0	1	1	0	1	0	0	0	1	0	0
5	2000	Kawai H	Japan	49	1	duodenal ulcer, HTN, alcohol absue, pancreatitis	pancreatitis	3	0	1	0	0	0	0	0	0	1	0	general malaise	0	0	0	1	1	1	0	0	ERCP	splenic artery calcification	0	0	1	0	0	0	0	1	0	0
6	2001	Pulcini G	Italy	57	1	Pancreatitis, alcohol abuse, Af	pancreatitis	3	1	0	0	0	0	0	0	0	1	0	0	0	1	0	1	1	0	0	0	0	0	0	0	1	0	0	0	0	1	0	0
7	2001	Storr M	Germany	41	1	Pancreatitis, alcohol abuse	pancreatitis	NA	0	1	0	1	0	0	0	1	0	0	dizziness, hepatomegaly	0	0	0	0	1	1	0	0	ERCP	0	0	0	0	1	0	0	0	1	0	0
8	2001	Zambrana García JL	Spain	62	1	Pancreatitis, alcohol abuse, DM, laryngeal cancer	pancreatitis	5	1	1	0	1	0	0	0	0	0	0	weight loss	0	1	0	1	1	1	0	0	0	0	0	0	0	1	0	0	0	1	0	0
9	2001	Maggiore D	Italy	38	1	Alcohol abuse	0	NA	1	1	1	1	0	0	0	1	1	0	0	1	0	0	0	0	1	0	0	0	0	1	1	1	0	0	0	0	1	0	0
10	2001	Sugimoto H	Japan	62	1	0	s/p pancreaticoduodenectomy, resection of portal v.	NA	1	0	1	0	0	0	0	0	0	0	0	0	1	0	1	1	0	0	0	0	0	1	1	0	1	0	0	0	1	0	0
11	2001	Androulakakis Z	Greece	77	1	Chronic myelomonocytic lerukemia	0	8	1	0	1	0	0	0	1	0	0	0	0	1	1	0	1	0	0	1	0	0	0	1	0	0	0	0	0	1	0	1	0
12	2001	Sun MS	Taiwan	63	0	Rheumatic heart disease, s/p mitral valve replacement, infective endocarditis	taking wafarin	2.5	1	1	0	0	0	0	0	0	0	0	dizziness	0	0	0	0	0	1	1	0	0	0	0	1	1	0	0	0	0	1	0	0
13	2001	Lacey SR	USA	62	1	Pancreatitis, alcohol abuse, chronic renal disease	pancreatitis	NA	0	1	0	0	0	0	0	0	0	0	0	0	0	0	1	1	1	0	0	ERCP	0	0	1	0	1	0	0	0	0	0	0
14	2001	Chung HJ	Taiwan	35	1	0	0	NA	1	1	0	1	0	0	0	1	0	0	0	0	0	1	0	1	1	0	0	RBC scintigraphy	0	0	0	1(pnacreatectomy, splenectomy)	1	0	0	0	0 (TAE failed once)	0	0
15	2001	Kossak J	Poland	35	1	alcohol abuse, duodenal ulcer, DM	pancreatitis	2.5	0	0	0	0	0	0	0	1	1	0	0	0	1	0	0	1	0	0	0	0	0	0	0	1 choledochojejunostomy	0	0	0	0	1	0	0
16	2002	Basile A	Spain	79	0	0	duodenal ulcer s/p antrectomy Roux-en-Y	0.5	0	1	1	0	0	0	0	0	0	0	0	0	0	1	0	1	1	0	0	RBC scintigraphy	0	1	0	0	1	0	0	0	1	0	0
17	2002	Weits T	Netherlands	75	1	Pancreatitis	pancreatitis	NA	1	0	0	0	0	0	0	0	0	0	0	0	0	0	1	1	0	0	0	0	0	0	0	0	1	0	0	0	1	0	0
18	2002	Mogi K	Japan	50	0	perforated pud s/p gastrectomy, infectious endocarditis s/p aortic valve replacement	infective endocarditis, warfarin use	4	0	1	0	0	0	0	0	0	0	0	0	0	0	1	0	0	1	0	0	0	0	0	1	1	0	0	0	0	1	0	0
19	2003	Franzese S	Italy	68	0	0	0	3	1	0	0	0	0	0	1	0	0	0	0	0	1	0	1	1	0	1	0	0	0	0	0	1	0	0	0	0	1	0	0
20	2003	Lo bue S	Belgium	69	1	cholecystitis	S/P cholecystectomy	NA	0	1	1	0	0	0	0	1	1	0	fever	0	0	2	0	1	1	0	0	ERCP	0	0	1	1	2	0	0	0	0 (TAE and surgery each failed once)	0	0
21	2003	Asakawa T	Japan	54	1	Alcohol abuse, DM, bowel obstrution s/p surgery, pancreatitis	pancreatitis	NA	1	1	1	1	0	0	0	0	0	0	general malaise, dizziness	0	0	1	2	2	0	1	0	0	0	0	0	1 pancreatoduodenectomy	1	0	0	0	0 (TAE failed once)	1	DIC, hepatic failure
22	2003	Kim DY	Korea	73	1	Gastric cancer	S/P gastrectomy	NA	1	0	1	0	0	0	0	0	0	0	fever	0	0	0	0	1	0	0	0	0	0	1	1	1	1	0	0	0	0 (TAE failed once)	0	0
23	2003	Suzuki T	Japan	65	1	Pancreatitis, alcohol abuse	pancreatitis	2	0	1	0	0	0	1	0	0	0	0	0	0	1	0	1	1	1	0	0	0	pseudoaneurysm rupture into superior mesenteric vein, portal vein thrombosis	0	1	0	1	0	0	0	1	0	0
24	2003	Orsenigo E	Italy	38	?	ESRD, DM	S/P pancrease-kidney transplantation	3	0	0	0	0	0	0	0	0	0	0	asymptomatic	1	0	0	0	1	0	0	1	0	0	0	0	0	1	0	0	0	1	0	0
25	2003	Manazer JR	USA	42	1	Pancreatitis, alcohol abuse	pancreatitis	3	1	0	0	0	0	0	0	1	1	0	0	1	0	0	1	1	0	0	0	0	0	0	0	0	1	0	1	0	0 (TAE failed once)	0	0
26	2003	*Seith A	India	28	1	0	pulmonary tuberculosis	NA	1	1	0	0	1	0	0	0	1	0	0	0	0	0	0	1	1	0	0	0	0	0	0	0	1	0	0	0	1	0	0
27	2003	Sparrow P	UK	50	0	Pancreatitis, alcohol abuse	pancreatitis	3	1	0	0	0	0	0	0	1	0	0	0	0	0	0	1	1	0	0	0	0	0	0	0	0	0	0	1	0	1	0	0
28	2003	Nakazawa K	Japan	61	1	0	0	1.5	1	0	1	0	0	0	0	0	0	0	0	0	0	0	1	1	0	0	0	0	0	1	1	1	0	0	0	0	1	0	bowel obstruction due to adhesion
29	2004	Ieda A	Japan	42	1	alcohol abuse, drug abuse	0	1	0	1	0	0	0	0	0	0	0	0	0	0	0	0	0	1	1	1	0	0	0	0	0	0	1	0	0	0	1	0	0
30	2004	Schmitt R	Austria	60	0	Pancreatitis, alcohol abuse, liver cirrhosis	pancreatitis	3	1	0	0	0	0	0	0	0	0	0	0	0	1	0	0	1	0	0	0	0	0	0	0	0	1	0	0	0	1	0	0
31	2004	Iyori K	Japan	65	0	HTN, thyroid cancer	0	3	0	0	0	0	0	0	0	0	0	0	asymptomatic	0	1	0	1	1	0	0	0	0	congenital absence of celiac trunk	0	0	1	0	0	0	0	1	0	0
32	2004	Young R	USA	80	0	HTN, CAD	S/P pancreatic head biopsy	8	1	0	0	1	0	0	0	1	0	0	nausea, vomiting	0	1	0	1	1	0	0	0	0	0	0	0	0	1	0	0	0	1	0	0
33	2004	Geoghegan T	Ireland	24	1	Pancreatitis, alcohol abuse	pancreatitis, infected pseudocyst	4	1	0	0	0	0	0	0	0	0	0	0	0	0	0	1	1	0	0	0	0	0	0	0	0	1	0	1	0	0 (TAE failed once)	0	0
34	2004	Jovanović M	Serbia	47	1	alcohol abuse, pancreatitis	pancreatitis	8.8	1	0	0	1	0	0	1	1	1	0	back pain	0	1	0	1	1	0	0	0	0	0	0	0	1 (including cholecystectomy and biliroth II)	0	0	0	0	1	0	Ileus, intraabdominal abscess
35	2004	Moore E(1)	USA	51	0	0	0	2.2	0	0	0	0	0	0	0	0	0	0	asymptomatic	0	0	0	0	1	0	0	0	0	celiac artery occlusion	0	0	1	0	0	0	0	1	0	renal and respiratory failure
36	2004	Moore E(2)	USA	37	1	Hepatic failure	0	3	0	0	0	0	0	0	0	0	0	0	asymptomatic	0	0	0	0	1	0	0	0	0	hepatic artery occlusion	0	0	0	1	0	0	0	1	0	0
37	2004	Moore E(3)	USA	67	0	0	0	?	0	0	1	0	0	0	0	0	0	0	cardiac arrest	1	0	0	0	0	0	0	0	0	0	1	1	1	0	0	0	0	0	1	0
38	2004	Ogawa H	Japan	67	1	DM, HTN, AMI, pancreatitis	pancreatitis	3	0	0	0	0	0	0	0	0	0	0	asymptomatic	0	0	0	1	1	0	0	0	0	0	0	0	0	1	0	0	0	1	0	0
39	2004	Ayers EW	USA	NA	1	0	0	1.6	0	0	1	0	0	0	0	0	0	0	fatigue	0	1	0	1	1	1	0	0	0	0	0	0	0	1	0	0	0	1	0	0
40	2005	Penninga L	Denmark	55	1	Pancreatitis, alcohol abuse	pancreatitis	3	1	1	0	0	0	0	0	0	0	0	0	0	0	0	1	1	1	0	0	0	0	0	0	0	1	0	0	0	1	0	0
41	2005	*Dönmez H	Turkey	20	1	Polyarteritis nodosa	polyarteritis nodosa	9	1	0	0	0	0	0	0	0	1	0	fever, nausea, weight loss, malaise	0	1	0	1	1	0	0	1	0	microaneuryms of gastroduodenal, hepatic, and renal arteries	0	0	0	1	0	0	0	1	0	0
42	2005	Sipahioglu MH	Turkey	25	1	ESRD	CAPD peritonitis, S/P Tenckoff catheter	5	1	0	0	0	0	0	0	0	1	0	0	0	1	0	0	1	0	0	1	0	hepatic artery aneurysm	0	0	1	0	0	0	0	1	1	septic shock
43	2005	Chiu CH	Taiwan	45	1	0	blunt abdominal trauma, biliary tract obstruction s/p PTCD	3.7	1	0	1	1	0	0	0	1	1	0	0	0	0	0	1	1	0	0	0	0	0	0	0	0	2	0	0	0	0 (TAE failed once)	0	0
44	2005	Radanovic	Croatia	51	1	Pancreatitis, alcohol abuse	pancreatitis	7.5	1	1	0	1	0	0	0	1	0	0	nausea	0	1 (endoscopic ultrasound	0	1	1	1	0	0	0	0	0	0	0	1	0	0	0	1	0	0
45	2006	Matsumoto I	Japan	55	1	DM, alcohol abuse	pancreatitis	1.5	1	1	0	1	0	0	0	1	0	0	coma	0	0	0	1	1	1	0	1	0	0	1	1	0	1	0	0	0	1	0	0
46	2006	Vizsy L	Hungary	62	0	Alcohol abuse	0	5.4	1	1	1	1	0	0	0	0	1	0	dizzi, malaise	1	0	0	1	0	2	0	0	ERCP (for biliary obstruction)	0	1	1	1	0	0	0	0	1	0	0
47	2006	Rowsell C	Canada	58	1	0	0	NA	0	1	0	0	0	0	0	0	0	0	0	0	0	0	0	0	2	0	0	0	0	0	0	1	0	0	0	0	1	0	0
48	2006	Noun R	Lebanon	58	1	Lymphoma, ampullary carcinoma, s/p splenectomy	S/P pancreaticoduodenectomy	1	0	1	1	0	0	0	0	0	0	0	0	0	0	0	1	1	0	0	0	0	0	0	0	0	2	1	0	0	0 (TAE failed once)	0	infected biloma
49	2006	Marrone G	Italy	44	1	Liver cirrhosis, HCV hepatitis, gastric ulcer S/P gastrectomy	0	2.5	0	1	0	0	0	0	0	0	0	0	0	0	1	0	1	1	0	1	1	0	arteroportal fistula	0	0	0	1	0	0	0	1	0	0
50	2006	Nouira K	Tunisia	40	1	Hemophilia A	Hemophilia A	NA	1	1	0	0	0	0	0	1	0	0	0	1	0	1	1	0	0	0	1	0	0	1	0	0	0	0	0	1	0	1	0
51	2006	Kuratate M	Japan	79	1	HTN, emphysema, gout	duodenal ulcer	6	0	1	0	0	0	0	0	0	0	0	0	1	0	0	1	1	0	0	0	0	0	0	0	1	1	0	0	0	0 (TAE failed once)	0	0
52	2006	Matsumato M	Japan	84	1	Hepatitis, urinary bladder cancer AMI	0	4.5	0	0	0	0	0	0	0	0	0	0	asymptomatic	0	1	0	1	1	0	0	1	0	0	0	0	1	0	0	0	0	1	0	0
53	2007	Aoufi S	Spain	47	1	HTN, aortic dissection S/P	0	7	0	0	0	0	0	0	0	0	1	0	fever	1	0	0	1	1	0	0	0	0	0	0	0	1	0	0	0	0	1	1	pulmonary embolism, left hepatic lobs ischemia S/P
54	2007	Takai A	Japan	77	1	pancreatitispancreatic cancer s/p partial pancreatectomy, pancreatic cyst	pancreatic pseudocyst	1.5	0	1	0	0	0	0	0	0	0	0	0	0	0	0	1	1	0	1	0	0	0	0	0	0	1	0	0	0	1	0	coil migration
55	2007	Carrafiello G	Italy	69	1	gall bladder stone s/p cholecystectomy, intestinal occlusion s/p anastomosis of transverse colon	pancreatitis, S/P cholecystectomy and colon resection, S/P intraabdominal drainage	NA	0	0	1	0	0	0	0	0	0	0	0	1	0	0	1	1	0	0	0	0	0	0	0	0	1	0	1	0	1	0	0
56	2007	Varadarajulu S(1)	USA	22	0	Pancreatitis	pancreatitis	3	0	1	0	0	0	0	0	0	0	0	0	1	0	0	1	1	0	0	0	0	0	0	0	0	1	0	0	0	1	0	0
57	2007	Bohl JL	USA	42	1	Pancreatitis, alcohol abuse	pancreatitis	6	1	1	1	1	0	0	0	1	1	0	weight loss	0	0	0	1	0	1	0	0	0	0	0	0	1 (pancreaticoduodenectomy)	0	0	0	0	1	0	pancreatic exocrine insufficiency
58	2007	Kumar B	USA	69	1	HTN, peptic ulcer, alcohol abuse, pancreatitis	pancreatitis	4.6	1	1	0	0	0	0	0	1	0	0	0	0	0	1	1	1	1	0	0	0	0	1	1	1 (pyloroplasty)	1	0	0	0	0 (surgery failed once)	0	0
59	2008	Kianmanesh R	France	56	1	Pancreatitis, alcohol abuse	pancreatitis	5.3	1	0	0	1	0	0	0	0	0	0	0	0	0	0	1	1	0	0	0	0	0	1	0	1	1	0	0	0	0 (TAE failed twice)	0	0
60	2008	*Piffaretti G	Italy	30	1	intravenous drug use, HCV-alcoholic-related chronic hepatits, HIV(+)	0	5.5	1	0	1	0	0	0	0	0	0	0	0	0	1	0	1	1	0	0	0	0	0	1	1	0	1	0	1	0	1	0	0
61	2008	Chong WW(1)	Singapore	55	1	hepatits B	0	5.4	0	0	0	0	0	0	0	0	0	0	asymptomatic	0	1	0	1	1	0	0	0	0	0	0	0	0	1	0	0	0	1	0	0
62	2008	Chong WW(2)	Singapore	46	1	alcohol abuse	pancreatitis	7.4	1	1	0	0	0	0	0	0	0	0	0	0	0	0	1	1	1	0	0	0	0	1	1	0	1	0	0	0	1	0	0
63	2008	Hu KC	Taiwan	26	0	0	0	NA	1	1	0	0	1	0	0	0	0	0	0	0	0	0	0	1	0	1	0	0	0	1	1	*tumor resection of duodenum	1	0	0	0	0 (TAE failed twice)	0	0
64	2008	Koren M	Slovakia	41	1	Pancreatitis, alcohol abuse, DM, s/p cholecystectomy and cholecystojejunostomy	pancreatitis	8	1	1	0	1	0	0	0	1	0	0	malaise, poor apetite	1	0	0	1	1	1	0	0	0	right hepatic artery aneurysm	0	0	0	2	1	0	0	0 (TAE failed once)	0	0
65	2008	Khan JN	UK	70	1	Prostate cancer, AMI	pancreatitis	6.5	0	0	0	0	0	0	0	0	1	0	0	0	0	0	1	1	0	0	0	0	0	0	0	0	1	0	0	0	1	0	0
66	2008	Kueper MA	Germany	60	0	s/p cholecystectomy	0	1,1(two GDA)	1	0	1	0	0	0	0	0	0	0	syncope	1	0	0	1	1	0	0	0	0	two GDAs	0	0	0	1	0	0	0	1	0	0
67	2008	Matsuno Y	Japan	72	0	HTN, liver cirrhosis	0	3	0	0	0	0	0	0	0	0	0	0	asymptomatic	0	1	0	1	1	0	0	0	0	0	0	0	1	0	0	0	0	1	0	0
68	2008	Battula N	UK	79	0	gastritis	0	6	0	0	0	0	0	0	0	0	0	0	asymptomatic	0	0	0	1	1	0	1	0	0	0	0	0	0	1	0	0	0	1	0	0
69	2008	Tomita M	Japan	86	0	HTN, DM, s/p cholecystectomy, colon cancer s/p left colon partial resection	0	2.8	0	0	0	0	0	0	0	0	0	0	asymptomatic	0	0	0	1	1	0	0	0	0	superior mesenteric artery stenosis	0	0	0	1	0	0	0	1	0	0
70	2009	Singh O	India	35	1	Pancreatitis	pancreatitis	NA	1	1	0	1	0	0	0	0	0	0	0	0	0	0	1	0	1	0	0	0	0	1	1	1	0	0	0	0	1	0	0
71	2009	Singhal M	India	35	1	Pancreatitis, alcohol abuse	pancreatitis	3.5	1	0	1	1	0	0	0	1	1	0	0	0	1	0	1	0	0	0	0	ERCP (for biliary obstruction)	0	0	0	1 Roux-en-Y cystojejunastomy	0	0	1	0	1	0	0
72	2009	Germanos S	UK	49	1	Pancreatitis	pancreatitis	5	0	0	0	1	0	0	0	1	1	0	0	0	0	0	1	1	0	0	0	0	0	0	0	0	1	0	0	0	1	0	0
73	2009	Chong CN	China	44	1	Alcohol abuse	pancreatitis	2	1	0	0	1	0	0	0	1	0	0	0	0	0	0	1	1	1	0	0	0	0	0	0	0	1	0	0	0	1	0	0
74	2009	Lee CH	Taiwan	48	0	0	0	NA	1	0	1	0	0	0	0	0	0	0	back pain	0	0	0	1	1	0	0	0	0	0	0	0	0	1	0	0	0	1	0	0
75	2009	Skipworth J	UK	45	1	Pancreatitis	pancreatitis	NA	1	1	1	0	0	0	0	1	0	0	0	0	0	0	1	5	0	0	0	0	splenic, left colonic ateries pseudoaneurysm	1	1	0	1	0	0	0	0 (TAE failed 4 times)	0	colonic enterocutaneous fistula, splenic infarction secondary to embolization, pancreatic abscess?
76	2009	Sato T	Japan	76	1	HTN	0	5	0	0	0	0	0	0	0	0	0	0	asymptomatic	0	1	0	1	1	0	0	0	0	0	0	0	1	0	0	0	0	1	0	0
77	2010	Kleinman JT	USA	47	1	Pancreatitis, alcohol abuse	pancreatitis	3	1	0	1	1	0	0	1	1	1	0	weight loss	0	0	0	1	1	0	0	0	0	0	0	0	0	1	0	0	0	1	0	0
78	2010	Gutiérrez-Macías A	Spain	56	1	alcohol abuse, chronic liver disease, pancreatitis, COPD, PPU	pancreatitis	NA	0	1	0	1	0	0	0	0	0	0	0	0	0	0	1	1	1	0	0	0	0	0	0	0	0	0	1	0	1	0	0
79	2010	Krishan S	UK	61	0	Pancreatitis	pancreatitis	6	0	0	0	0	0	1	0	0	0	0	asymptomatic	0	0	0	1	1	0	0	0	0	GDA fistulated to SMV	0	0	0	0	1	0	0	1	0	0
80	2010	Marjanovic IR	Serbia	56	1	Peptic ulcer disease	0	6.8	1	0	0	0	0	0	0	0	0	0	a palpable pulsate mass	0	0	0	1	1	0	0	0	0	0	0	0	0	0	1	0	0	1	0	0
81	2010	Nowak G (P99)	Poland	29	1	DM, pancreatitis	pancreatitis	NA	1	0	0	1	0	0	0	1	1	0	fever	0	1	0	0	1	0	0	0	ERCP (for biliary obstruction)	0	0	0	1 for biliary obstruction	1	0	0	0	1	0	biliary obstruction and cholangiits
82	2010	Harris K	USA	64	1	0	anticoagulant use	3.1	1	0	1	0	0	0	0	0	0	0	altered mentat status, back pain	0	0	1	1	1	0	0	0	0	0	1	0	1	1 twice	0	0	0	0 (TAE failed twice)	0	0
83	2010	Fodor M	Romania	69	1	Pancreatitis, alcohol abuse	pancreatitis	2.5	0	1	0	1	1	1	0	0	1	0	0	0	0	0	1	0	1	0	0	ERCP (for biliary obstruction)	hepatic artery fistula	1	1	1	0	0	0	0	1	0	0
84	2010	Sanada Y	Japan	55	1	Biliary carcinoma	biliary carcinoma S/P pancreaticoduodenectomy	2.7	1	1	1	0	0	0	1	1	1	0	fever	0	0	0	1	1	1	0	0	0	0	1	1	0	1	0	0	0	1	0	liver infarction, intrahepatic biloma, and abscess
85	2010	Volpi MA	Uruguay	69	1	HTN, alcohol abuse	0	5	0	1	0	0	0	0	0	0	0	0	a palpable pulsate mass	0	0	0	1	1	1	0	0	0	0	0	0	0	1	0	0	0	1	0	0
86	2010	Sima L	Romania	55	1	inguinal hernia, HTN, angina	0	NA	1	0	1	0	0	0	0	0	0	0	back pain, dizzi, altered mental state	1	0	0	0	0	0	0	0	0	0	1	1	1	0	0	0	0	1	0	acute pancreatitis
87	2010	Elazary R	Israel	18	0	Crohn's disease	surgery for perforated peptic ulcer	NA	0	1	1	0	0	0	0	0	0	0	palpable pulsatile mass in RUQ, nausea	0	0	0	1	1	1	0	0	0	0	1	1	0	1	0	0	0	1	0	0
88	2010	Ariga H	Japan	46	0	Duodenal ulcer	0	NA	1	1	1	0	0	0	0	0	0	0	dizziness	0	0	0	0	1	1	0	0	0	0	0	0	0	1	0	0	0	1	0	0
89	2011	Skipworth JR	UK	55	1	Pancreatitis, alcohol abuse, cirrhosis, DM	pancreatitis	NA	1	0	0	0	0	0	1	1	0	0	weight loss	0	0	0	1	1	0	0	0	ERCP (for duodenal obstruction)	0	0	0	0	1	0	0	0	1	0	coil migration, duodenal obstruction required duodenal stenting
90	2011	Hoorn EJ	Netherlands	25	0	SLE	SLE pancreatitis	NA	1	0	1	0	0	0	1	0	0	0	0	0	0	0	1	1	0	0	1	0	0	0	0	0	1	0	0	0	1	0	bowel obstruction
91	2012	Łasocha B	Poland	53	1	Pancreatitis	pancreatitis	8.2	0	0	0	0	0	0	0	1	0	1	0	0	0	0	1	1	0	0	0	0	splenic artery fistula	0	0	0	1	0	0	0	1	0	0
92	2012	Mazza E	Italy	61	1	pancreatic carcinoid	pancreatic carcinoid s/p intermediate resection of pancreas and pancreatic-gastrostomy, acute pancreatitis	4	1	0	1	1	0	0	0	0	0	0	fever	0	1	0	1	1	0	0	0	0	pseudoaneurysm of superior pancreaticoduodenal artery	0	0	0	1	0	0	0	1	0	0
93	2012	Sadek M	USA	83	0	ESRD	0	4.5	1	0	0	0	0	0	0	0	1	0	0	0	0	0	1	1	0	0	0	0	0	1	0	0	1	0	0	0	1	0	0
94	2012	Mitkov M	USA	69	1	HTN, dilated cardiomyopathy, Af, hyperlipidemia	0	NA	1	0	1	0	0	0	0	1	0	0	fatigue	0	0	0	1	1	0	0	0	0	celiac artery aneurysm	0	0	0	1	0	0	0	1	0	0
95	2012	Grözinger G	Germany	34	0	familiar adenomatous polyposis, pregnancy?	0	3	1	0	0	0	0	0	0	0	0	0	0	0	1	0	0	1	0	0	1	0	0	0	0	0	1	0	0	0	1	0	0
96	2012	Savage J	New Zealand	67	0	multiple sclerosis, ankylosing spondyllitis, ulcerative colitis	0	NA	1	0	1	0	0	0	0	0	0	0	0	1	0	0	0	0	0	0	0	0	0	1	1	1	0	0	0	0	1	0	0
97	2012	Lykoudis PM	Greece	65	0	0	0	NA	1	0	0	0	0	0	0	0	0	0	0	0	0	0	1	1	0	0	0	0	0	0	0	0	0	1	0	0	1	0	0
98	2012	Klauß M	Germany	47	NA	Pancreatitis, alcohol abuse	pancreatitis	6.5	1	0	1	0	0	0	0	0	0	0	0	0	1	0	1	1	1	0	0	0	0	0	0	0	1	0	0	0	1	0	0
99	2013	Leow VM	Malaysia	53	1	Alcohol abuse	0	NA	1	1	1	1	0	0	0	1	1	0	back pain, abdominal mass	0	1	0	1	1	1	0	0	0	0	1	0	0	1	0	0	0	1	0	0
100	2013	Jain AKC	India	32	1	Pancreatitis, alcohol abuse	pancreatitis	NA	1	0	1	1	0	0	0	1	0	0	0	1	0	0	1	0	0	0	0	0	0	0	0	1	0	0	0	0	1	0	0
101	2013	Gaduputi V	USA	74	1	liver cirrhosis, gastric ulcer S/P B II, GB stone S/P choleystectomy, CBD stones	complicated gastric ulcers s/p Billroth II surgery, ERCP for biliary obstruction, pancreatitis	NA	1	0	1	1	0	0	0	1	1	0	0	0	0	2	1	1	0	0	0	0	0	1	1	0	1	0	0	0	1	0	0
102	2013	Motoi S	Japan	61	1	Pancreatitis	pancreatitis	5.5	0	1	0	0	0	0	0	0	0	0	0	0	0	0	1	1	1	0	0	0	0	1	1	1	0	0	0	0	1	0	pancreatic leakage
103	2014	Kumaresh A	India	65	0	DM	0	1.5	1	0	0	0	0	0	0	0	0	0	weight loss	0	1	0	1	1	1	0	0	0	arch of Riolan artery aneurysm	0	0	0	0	0	0	1	0	1	0
104	2014	Badea R	Romania	82	0	HTN, CAD, breast cancer	0	2.9	1	0	0	0	0	0	0	0	0	0	abdominal mass	0	1	0	1	0	0	0	0	0	abdominal aortic aneurysm	0	0	0	0	0	0	1	1	0	0
105	2014	Ghasura AA	India	NA	?	Pancreatitis, alcohol abuse	pancreatitis	NA	1	0	1	0	0	0	0	1	1	0	nausea	0	0	0	1	1	0	0	0	ERCP (for biliary obstruction)	0	0	1	1 partial cholecystectomy	1	0	0	0	0 (TAE failed once)	0	coil migration, GB perforation, Diabetes insipidus
106	2014	Loveček M	Czech Republic	58	1	HTN	pancreatoduodenectomy for pancreatic tumor	NA	1	1	0	0	0	0	0	1	1	0	0	1	0	0	1	1	1	0	0	0	0	0	0	0	0	1	0	0	1	0	0
107	2014	Huang CF	Taiwan	55	1	HTN, peptic ulcer	0	NA	1	0	1	0	0	0	0	0	0	0	back pain	1	0	1	1	1	0	0	0	0	0	1	1	0	1	0	0	0	0 (TAE failed)	1	0
108	2014	Adam S	South Africa	55	1	0	S/P laparotomy for penetrating injury	NA	1	1	1	0	0	0	0	0	0	0	0	0	0	0	1	1	0	0	0	0	0	0	0	0	1	0	0	0	1	0	0
109	2015	Santos-Rancaño R	Spain	48	1	Alcohol abuse	0	8.3	1	1	0	0	0	0	0	0	0	0	0	0	0	0	1	1	1	0	0	0	0	0	0	1 duodenotomy, GDA was missed	1	0	0	0	1	0	0
110	2015	Aggarwal A	USA	72	1	multiple myeloma, deep venous thrombosis	0	6.9	0	0	0	0	0	0	0	0	0	0	back pain	0	1 (endoscopic ultrasound	0	1	1	0	1	0	0	0	0	0	0	1	0	0	0	1	0	0
111	2015	Yen YT	Taiwan	43	1	HTN, DM, alcohol abuse	0	NA	1	0	0	0	1	0	0	0	1	0	weight loss	0	1	0	1	1	0	0	0	ERCP (for biliary obstruction)	hepatic and splenic artery aneurysm	0	0	0	1	0	0	0	1	0	0
112	2015	Shawky MS	Epypt	45	0	HTN, ESRD	traumatic pancreatic laceration S/Pdistal pancreatectomy and splenectomy	4	1	1	0	0	0	0	0	0	0	0	dizzi, fever	0	0	0	1	1	1	0	0	0	0	1	1	0	1	0	0	0	1	0	0
113	2015	Rana SS	India	22	1	Post-traumatic pancreatitis	S/P stenting drainage for pseudocyst	NA	1	1	1	0	0	0	0	0	0	0	0	0	0	0	1	1	0	1	0	0	0	1	0	0	1	0	0	0	1	0	0
114	2015	Jain SK	India	21	1	Post-traumatic pancreatitis	post-traumatic pancreatitis	NA	1	1	1	1	0	0	1	1	0	0	0	0	0	0	1	1	0	1	0	0	0	1	1	0	1	0	0	0	1	0	0
115	2015	Im KS	Korea	43	1	Duodenal ulcer, neurofibromatosis	0	NA	1	1	0	0	0	0	0	0	0	0	0	0	0	0	1	1	1	0	0	0	right renal artery aneurysm	1	1	0	1	0	0	0	1	0	0
116	2015	Kuppusamy S(2)	India	40	1	alcohol abuse, pancreatits	pancreatitis	3.7	1	1	0	0	0	0	0	1	1	0	0	0	1	0	1	1	0	0	0	0	0	0	0	0	1	0	0	0	1	0	0
117	2015	Isono K	Japan	73	1	HTN	duodenal ulcer	0.6	1	1	0	0	0	0	0	0	0	0	0	0	0	0	1	1	1	second endoscopy	0	0	0	0	0	0	1	0	0	0	1	0	0
118	2016	Gassend JL	Switzerland	75	0	HTN, pancreatitis	pancreatitis	2	1	0	0	0	0	0	0	0	1	0	0	0	0	0	1	1	1	0	0	0	0	0	0	0	1	0	0	0	1	0	lower limb ischemia need thrombolysis
119	2016	Priya P(1)	India	64	1	0	Pancreatitis, S/P endoscopic sphincterotomy	NA	1	1	0	1	1	0	0	0	0	0	0	0	0	0	0	1	1	0	0	0	0	0	0	0	1	0	0	0	1	0	0
120	2016	Priya P(2)	India	72	1	0	S/P endoscopic sphincterotomy	NA	0	1	0	0	0	0	0	0	0	0	0	0	0	0	1	1	0	1	0	0	0	0	0	0	1	0	0	0	1	0	0
121	2016	Miyazawa R	Japan	71	1	cholangiocarcinoma	S/P pancreaticoduodenectomy, S/P TAE for stump bleeding	NA	0	0	0	0	0	0	0	0	0	0	asymptomatic	0	0	0	1	1	0	0	0	0	0	0	0	0	0	1	0	0	1	0	0
122	2016	Branquinho D	Portugal	40	0	SLE	cyclosporine-induced pancreatitis, anticoagulant use	NA	1	0	1	1	0	0	0	1	0	0	fever	0	0	0	1	1	0	0	0	0	superior pancreaticoduodenal artery, pancreaticoduodenal artery aneurysm	1	1	0	2	0	0	0	0 (TAE failed once)	0	0
123	2016	Babu A	India	20	1	0	pancreatic contusion	NA	1	1	1	0	0	0	0	0	0	0	0	0	0	0	0	1	0	0	1	0	0	0	0	0	1	0	0	0	1	0	0
124	2016	Budzyński J	Poland	42	0	DM, pancreatitis	pancreatitis, pancreatic pseudocyst s/p drainage, pancreatic tumor	5	1	1	0	0	0	0	0	1	1	0	0	1	0	0	1	1	0	0	0	0	0	0	0	0	1	0	0	0	0 (TAE failed once)	0	0
125	2016	Razik R	Canada	62	0	Gall stone pancreatitis, S/P cholecystectomy	pancreatitis	2	0	1	1	0	0	0	0	0	1	0	0	0	0	0	2	2	0	2	0	0	0	1	1	0	2	0	0	0	0 (TAE failed once)	0	0
126	2016	Rebeiz K	Lebanon	24	0	0	pancreatic neuroendocrine tumor	1.5	1	0	0	0	0	0	0	0	0	0	0	0	0	0	1	1	0	0	0	0	multiple arcade GDA aneurysms	0	0	0	1	0	0	0	1	0	0
127	2016	Kohama K	Japan	85	1	0	laparotomy for perforated gastric ulcer	1.5	0	1	0	0	0	0	0	0	0	0	0	0	0	0	1	1	1	0	0	0	0	1	1	1 duodenotomy	1	0	0	0	0 (TAE failed)	0	0
128	2017	Shkliaev AE	Russia	77	0	cholecystitis S/P cholecystectomy	pancreatitis	4.3	1	0	0	0	0	0	0	1	1	0	weight loss	0	1	0	1	1	1	0	1	0	0	0	0	0	1	0	0	0	1	0	0
129	2017	Dutra S	Portugal	39	1	Pancreatitis, alcohol abuse, HTN	pancreatitis	3.9	1	0	1	0	0	0	0	0	0	0	0	0	1	0	1	1	0	0	0	0	0	1	0	0	1	0	0	0	1	0	0
130	2017	Wang H	China	55	1	HTN, cerebral infarction	0	NA	1	0	1	0	0	0	1	0	0	0	0	0	0	0	1	1	0	0	0	0	1 inferior pancreaticoduodenal artery	0	0	0	1	0	0	0	1	0	0
131	2017	Zaafouri H	Tunisia	55	1	Alcohol abuse, biliary pancreatitis, cholecystits	S/P laparoscopic cholecystectomy	NA	1	1	0	0	1	0	0	0	1	0	0	0	0	1	1	1	1	0	0	ERCP (for extraction of biliary coil and stone)	0	1	1	0	1	0	0	0	1	0	biliary obstruction and cholangiits
132	2017	Sharma M	India	28	1	Pancreatitis	pancreatitis	1.7	1	0	0	0	0	0	0	0	0	0	0	0	1	0	1	1	0	0	0	0	0	0	0	0	1	0	0	0	1	0	0
133	2017	*Bachmeyer C	France	67	0	Wegener granulomatosis	0	4	1	0	1	0	0	0	0	0	0	0	0	0	0	0	1	1	0	0	0	0	0	1	1	0	1	0	0	0	1	1	ischemic necrosis of stomach
134	2017	Khan AA	Pakistan	36	1	0	pancreatitis	2.2	1	0	0	0	0	0	1	1	0	0	0	0	0	0	1	1	0	0	0	0	0	0	0	0	0	0	0	1 (spontaneous thrombosis of pseudoaneurysm)	1	0	0
135	2017	Zuhaili B	USA	65	1	0	pancreatitis	3.2	1	0	0	0	0	0	0	1	0	0	0	0	0	0	1	1	0	1	0	0	1 abdominal aortic aneurysm	0	0	0	1	0	0	0	1	0	0
136	2017	Abdelgabar A(2)	Belgium	67	1	Lympohoma, pancreatitis	pancreatitits	2.4	1	1	0	0	0	1	0	0	0	0	0	1	0	0	1	1	1	0	0	0	arterioportal fistula	0	0	0	1	1	0	0	1	0	0
137	2018	*Britto MM	Australia	69	0	HTN, heart failure, Af	0	2	1	0	1	0	0	0	0	0	0	0	0	0	0	0	1	1	0	0	0	0	two GDA aneurysms, celiac, splenic, renal aneurysms, dissection flap of celiac axis	0	0	0	1	0	1	0	0 (percutaneous thrombin injection failed once)	0	0
138	2018	Doo YJ	Korea	68	1	DM, chronic kidney disease	EUS FNA of pancreas, hemosuccus pancreaticus, pancreatic cancer	2	1	1	1	0	0	0	1	1	1	0	0	1	0	0	1	1	0	0	0	ERCP (for biliary obstruction)	0	1	1	1 pancreaticoduodenectomy	1	1 (biliary stent)	0	0	1	0	0
139	2018	Santos FS (2)	Brasil	54	0	Pancreatitis, alcohol abuse	pancreatitits	NA	1	1	0	0	0	0	0	0	1	0	fever, weight loss	0	0	0	1	1	1	0	0	0	0	0	0	0	1	0	0	0	1	0	0
140	2018	Zarin M	Pakistan	18	1	0	traumatic pancreatic pseudocyst S/P roux-en-y-cystojejunostomy	NA	0	1	0	0	0	0	0	0	0	0	0	0	0	0	0	1	0	0	0	0	0	0	1	0	1	0	0	0	1	0	0
141	2018	Han SP	Australia	72	1	DM, HTN, CAD, Af	0	NA	1	0	1	0	0	0	0	0	0	0	0	0	0	0	1	1	0	0	0	0	0	1	1	0	1	0	0	0	1	0	1 ischemic pancreatitis
142	2018	Galanakis V	UK	79	1	Aortic and mitral valve repair, aortic dissection, Af, cerebral infarction	0	2	1	0	1	0	0	0	1	1	1	0	weight loss	0	0	1	1	1	0	0	0	0	a hepatic artery pseudoaneurysm	1	1	0	1	0	0	0	1	0	0
143	2018	Harris TJ	USA	67	1	Gall stone pancreatitis, S/P cholecystectomy	Gall stone pancreatitis, S/P cholecystectomy	NA	0	1	0	0	0	0	0	0	0	0	0	0	0	0	1	1	0	0	0	0	0	1	1	0	1	0	0	0	1	0	1 diffuse hemorrhagic gastritis
144	2018	Gião Antunes A	Portugal	54	1	Pancreatitis, alcohol abuse	pancreatitis	4	1	0	0	0	0	0	1	0	0	0	0	1	0	1	0	0	0	1	1	0	0	0	0	0	0	0	0	1 (spontaneous thrombosis of pseudoaneurysm)	1	0	0
145	2018	Kar H	Turkey	60	1	0	0	NA	1	0	1	0	0	0	0	0	0	0	0	0	0	1	0	1	0	0	0	0	0	1	1	1 evaculation hematoma and packing	1	0	0	0	0 (surgery failed once)	0	0
146	2018	Gupta V (1)	India	36	1	Pancreatitis, alcohol abuse	pancreatitis	1	1	1	0	0	0	0	0	1	0	0	0	0	0	0	1	1	0	0	0	0	0	0	0	1 pancreatic head excision	1	0	0	0	1	0	0
147	2018	Gupta V (2)	India	42	1	Pancreatitis, alcohol abuse	pancreatitis	1.5	1	1	0	0	0	0	0	1	0	0	0	0	0	0	1	1	0	0	0	0	0	0	0	1 pancreatic head excision	0	0	1	0	1	0	0
148	2018	Gupta V (3)	India	62	1	Pancreatitis, alcohol abuse	pancreatitis	3	1	1	0	0	0	0	0	1	0	0	0	0	0	0	1	1	0	0	0	0	0	0	0	1 for aneurysm excision and pancreatic head excision	1	0	1	0	0 (TAE and thrombin injection failed once)	1	0
149	2018	Gupta V (4)	India	55	1	Pancreatitis	pancreatitis	1.5	1	1	0	0	0	0	0	1	1	0	0	0	0	0	1	0	0	0	0	ERCP for pseudocyst	0	0	0	1	0	0	1	0	0 (thrombin injection failed)	0	0
150	2018	Gupta V (5)	India	36	1	Pancreatitis, alcohol abuse	pancreatitis	2.5	1	1	0	0	0	0	0	1	0	0	0	0	0	0	1	1	0	0	0	ERCP for pseudocyst	0	0	0	0	0	1 (pancreatic stent)	1	0	1	0	0
151	2018	Gupta V (6)	India	24	1	Pancreatitis	pancreatitis	1.2	1	1	0	0	0	0	0	1	0	0	0	0	0	0	1	1	0	0	0	ERCP for pseudocyst	0	0	0	0	1	1 (pancreatic stent)	1	0	1	0	0
152	2018	Gupta V (7)	India	35	1	Pancreatitis, alcohol abuse	pancreatitis	1.8	1	1	0	0	0	0	0	1	0	0	0	0	0	0	1	1	0	0	0	percutaneous drainage of pseudocyst	0	0	0	0	0	0	0	0	1	0	0
153	2018	Gupta V (8)	India	37	1	Pancreatitis, alcohol abuse	pancreatitis	1.8	1	1	0	0	0	0	0	1	0	0	0	0	0	0	1	1	0	0	0	ERCP for pseudocyst	0	1	1	1	0	0	0	0	1	0	0
154	2018	Gupta V (9)	India	42	1	Pancreatitis, alcohol abuse	pancreatitis	3.5	1	1	0	0	0	0	0	1	0	0	0	0	0	0	1	1	0	0	0	0	0	0	0	0	1	0	0	0	1	0	0
155	2018	Gupta V (10)	India	40	1	Pancreatitis, alcohol abuse	pancreatitis	1.8	1	1	0	0	0	0	0	1	0	0	0	0	0	0	1	1	0	0	0	0	0	0	0	1	1	0	0	0	1	0	0
156	2019	Casas Deza D	Spain	74	0	Af, pancreatitis	pancreatitis	2.4	1	1	0	0	0	0	0	0	1	0	syncope	1	0	1	1	1	1	0	0	ERCP	0	0	0	0	1	0	0	0	1	0	0
157	2019	Lee FM	Australia	48	1	Pancreatitis, alcohol abuse	pancreatitis, S/P needls aspiration of pancreatic mass	6.6	1	0	1	0	0	0	0	1	1	0	0	0	1	0	1	1	0	0	0	ERCP	0	0	0	0	1	0	0	0	1	0	0
158	2019	Sharma M	India	50	1	Pancreatitis, alcohol abuse	pancreatitis	6	0	1	0	0	0	0	0	0	0	0	0	0	2 (abdominal and endoscopic ultrasound)	0	1	1	0	1	0	0	0	1	0	0	1 (coil 1, thrombin 2)	0	2	0	0 (thrombin twice after coli)	0	0
159	2019	Casas ALF	France	20	1	gastritis, hiatus hernia	0	9.5	1	0	0	0	0	0	1	0	0	0	0	0	0	0	1	1	0	0	0	0	stenosis of celiac trunk	0	0	0	1	0	0	0	1	0	0
160	2019	Binetti M	Italy	70	1	COPD, alcohol abuse	0	1.6	0	1	0	0	0	0	0	0	0	0	0	0	0	0	1	1	3	0	0	0	0	1	1	1 gastrotomy (no aneurysm was found)	2	0	0	0	0 (surgery and TAE failed once)	0	0
161	2019	Awada Z	USA	56	1	HTN, CAD, ESRD, adrenal insufficiency	Post-Billroth II Surgery	2.5	0	1	1	0	0	0	0	0	0	0	0	0	0	0	1	1	2	0	0	0	0	1	1	1	0	0	0	0	1	0	0
162	2019	Nguyen AT	Denmark	78	0	DM, heart disease	history of intraabdominal aneurysm	20	1	0	1	0	0	0	0	0	0	0	syncope	1	0	0	1	1	0	0	0	0	gastric artery aneurysm	0	0	0	1	0	0	0	1	0	0
163	2019	Phelps TN	USA	55	1	Intraductal papillary mucinous neoplasm	surgery for intraductal papillary mucinous neoplasm	NA	0	1	1	0	0	0	0	0	0	0	0	0	0	0	1	1	0	0	0	0	bleeding from inferior pancreatic artery and right hepatic artery	1	1	0	1 percutaneous approach twice	0	0	0	0 TAE failed once	0	0
164	2019	Gurala D	India	30	1	Pancreatitis, alcohol abuse, splenic vein thrombosis	pancreatitis	2.9	1	0	0	0	0	0	0	0	0	0	0	0	0	0	1	1	0	0	0	0	0	0	0	0	1	0	0	0	1	0	0
165	2020	Belmir H	Morocco	83	NA	HTN, DM	0	6	1	1	0	0	0	0	0	0	0	0	0	0	0	0	1	0	0	1	0	0	0	1	1	1	0	0	0	0	1	0	0
166	2020	Saqib NU	USA	68	1	Liver cirrhosis, pancreatitis	pancreatitis	4.5	1	1	0	1	0	0	0	0	0	0	dyspnea	0	0	0	1	1	1	0	0	0	0	1	1	0	1	0	0	0	1	0	0
167	2020	Taboada CR	Spain	39	0	0	0	2	0	0	0	0	0	0	0	0	0	0	asymptomatic	0	1	0	1	1	0	0	0	0	0	0	0	0	1	0	0	0	1	0	0
168	2020	Chen X	China	55	1	HTN, pancreatitis	pancreatitis	9.2	1	0	0	0	0	0	1	1	1	0	weight loss	0	0	0	1	0	0	0	0	0	0	0	0	1	0	0	0	0	1	0	Whipple operation for dudenal ischemia and pancreatitis
169	2020	Ly M	Australia	75	1	CKD, gallstone pancreatitis	S/P biliary stent during ERCP, s/p cholecystectomy	1.4	0	1	0	0	0	0	0	0	0	0	0	0	0	0	1	0	0	0	0	0	0	0	0	0	1	0	0	0	1	0	Coil migration into duodenum
170	2020	Kunitomo A	Japan	54	1	HTN, asthma, sleep apnea syndrome, bronchial gangliocytic paraganglioma s/p surgery	duodenum neuroendocrine tumor s/p distal gastrectomy with Roux en-Y reconstruction	NA	0	1	0	0	0	0	0	0	0	0	0	0	0	0	1	1	0	1	0	0	0	1	1	0	1	0	0	0	1	0	0
171	2020	Yoshida K	Japan	68	1	gallbladder cancer	S/P hepectomy	NA	0	1	0	1	1	0	0	0	0	0	0	0	0	0	1	1	1	0	0	0	0	1	1	0	1	0	0	0	1	0	0
172	2020	Kavitha TK	India	10	1	0	sepsis	NA	0	1	0	0	0	0	0	0	0	0	skin rash, fever	0	0	0	1	1	1	0	0	0	0	1	1	1	1	0	0	0	TAE failed twice	0	0
173	2020	Chang D	USA	71	1	Dementia	duodenal ulcer	1.5	0	1	0	0	0	0	1	0	0	0	0	0	0	0	0	1	1	0	0	0	0	1	1	0	1	0	0	0	0 TAE failed once	0	coil migration into the duodenal ulcer
174	2020	Sgantzou IK	Greece	64	1	Pancreatitis, alcohol abuse	pancreatitis s/p cystogastrostomy, pulmonary embolism s/p anticoagulants	0.9	1	1	0	0	0	0	1	1	1	1	0	0	0	2	1	1	1	0	1	0	2nd gastroduodenal pseudoaneurysm	1	1	0	1	0	0	0	1	0	pulmonary embolism
175	2020	*Jensen KK	Denmark	40	1	0	Median arcuate ligament syndrome	NA	0	1	0	0	0	0	0	0	0	0	syncope, weight loss	0	0	1	1	1	0	1	0	0	celiac trunck stenosis secondary to external compression by the median, pancreaticodorsal artery pseudoaneurysm arcuate ligament	0	0	1 duodenotomy, adhesiolysis for median arcuate ligament syndrome	1	0	0	0	1	0	0
176	2020	Ahmed G	UK	56	0	Alcohol abuse	pancreatitis, Median arcuate ligament syndrome	2	1	1	0	0	0	0	0	0	0	0	0	0	0	0	1	1	1	0	0	0	celiac trunck stenosis secondary to external compression by the median arcuate ligament	0	0	0	1	0	0	0	1	0	0
177	2020	Al Baghdadi M	USA	58	0	Graves' disease, asthma, multiple sclerosis	0	3.2	1	0	1	0	0	0	1	0	0	0	0	1	0	0	1	1	0	0	0	0	0	0	0	0	1	0	0	0	1	0	bowel obstruction due to abdominal hematoma S/P percutaneous drainage
178	2021	Loukil I	Tunisia	69	0	HTN, DM	0	0.6	1	1	0	0	0	0	0	0	0	0	0	0	0	0	1	1	0	0	0	0	0	0	0	1	0	0	0	0	1	0	0
179	2021	Nayyar G	India	55	1	Pancreatitis, alcohol abuse	pancreatitis	NA	1	1	0	0	0	0	0	1	1	0	0	1	0	0	1	1	1	0	0	0	0	0	0	0	1	0	0	0	1	0	0
180	2021	Shrestha A	Nepal	45	0	0	0	NA	1	0	1	0	0	0	1	0	0	0	dyspnea	0	0	0	1	1	0	0	0	0	0	0	0	0	1	0	0	0	1	0	0
181	2021	João M	Portugal	58	1	Hypopharyngeal cancer	S/P percutaneous endoscopic gastrostomy tube placement	1.7	0	1	0	0	0	0	0	0	0	0	0	0	0	0	1	1	0	0	0	0	0	0	0	0	1	0	0	0	1	0	0
182	2021	Anwar MN	Pakistan	43	0	Pancreatitis, cholecystittis	pancreatitis	NA	1	1	0	0	0	0	0	0	0	0	weight loss	0	0	0	1	1	0	0	0	0	superior/inferior pancreaticoduodenal, superior mesenteric, superior pancreaticoduodenal artery	0	0	0	1	0	0	0	1	0	0
183	2021	Ashraf MF	USA	45	1	GERD, pancreatitis, alcohol abuse	pancreatitis	NA	1	1	0	0	0	0	0	0	0	0	0	0	0	1	1	1	1	0	0	0	0	0	0	0	1	0	0	0	1	0	gastric outlet obstruction secondary to ischemia
184	2021	Stravodimos G	Greece	71	1	HTN, DM, Trigeminal Neuralgia	S/P perforated peptic ulcer, cholecystectomy	1.5	1	1	1	0	0	0	0	0	0	0	0	0	0	0	1	1	0	0	0	0	0	1	1	1 laparotomy for bile leak	1	0	0	0	1	1	bowel and bile leak
185	2021	Chapman BM	USA	74	1	Pancreatitis, alcohol abuse	pancreatitis	6	1	0	0	0	0	0	0	1	1	0	0	0	0	0	1	1	0	0	1	ERCP (for biliary obstruction)	0	0	0	1	0	1 (biliary stent)	0	0	1	0	0
186	2021	Lazzara C(1)	Spain	38	0	Obstructive sleep apnea	after hypoabsorptive bariatric surgery	0.8	0	1	0	0	0	0	0	0	0	0	0	0	0	0	1	1	1	0	0	0	0	1	1	0	1	0	0	0	1	0	0
187	2021	Lazzara C(2)	Spain	60	0	0	after hypoabsorptive bariatric surgery	0.7	0	1	0	0	0	0	0	0	0	0	0	0	0	1	1	1	1	0	0	0	0	0	0	0	1	0	0	0	1	0	0
188	2021	Lazzara C(3)	Spain	52	0	DM, obstructive sleep apnea, right renal cancer S/P nephrectomy	after hypoabsorptive bariatric surgery	1.7	1	1	0	0	0	0	0	0	0	0	0	0	0	1	1	1	2	0	0	0	0	1	1	0	1	0	0	0	0 TAE failed twice	0	0
189	2021	Abu Jhaisha S	Germany	56	1	Pancreatitis, alcohol abuse	pancreatitis	2.7	0	1	0	0	0	0	1	1	1	0	0	0	0	0	1	1	2	0	0	0	0	0	0	0	1	0	0	0	1	0	0
190	2021	Cui HY	China	39	1	Pancreatitis	pancreatitis	4.1	0	1	0	1	0	0	0	1	0	0	0	0	0	0	1	1	2	0	0	0	0	1	1	0	1	0	0	0	1	0	0
191	2021	Kurniawan K	Indonesia	44	0	0	prior laparoscopic cholecystectomy	NA	1	1	0	0	1	0	0	0	1	0	0	1	0	0	0	1	0	1	0	0	0	1	1	1	0	0	0	0	1	1	ventilator related pneumonia
192	2021	McGuire A	USA	53	1	DM, Af, peptic ulcer	history of GDA aneurysm	3	1	0	0	0	0	0	0	0	0	0	0	0	0	0	1	1	0	0	0	0	celiac artery aneurysm	0	0	0	1	0	0	0	1	0	0
193	2021	Sinduja R	India	70	1	Alcohol abuse	duodenal diverticulitis	0.6	1	1	0	0	0	0	0	0	0	0	0	1	0	0	1	1	0	0	0	0	0	1	1	0	1	0	0	0	1	0	0
194	2021	Macedo C	Portugal	77	1	DM, heart failure	pancreatitis, percutaneous drainage	NA	0	1	0	0	0	0	0	0	0	0	0	0	0	0	1	1	0	1	0	0	0	1	0	1 open necrosectomy for pancreatitis	1	0	0	0	1	1	infection
195	2021	Shell M	USA	46	0	HTN	0	3.5	1	1	0	0	0	0	0	0	1	0	0	0	1	0	1	1	0	1	0	ERCP (for biliary obstruction)	0	0	0	0	1	1 (biliary stent)	0	0	1	0	0
196	2022	Li L	Japan	72	1	Cholangiocarcinoma	S/P pancreaticojejunostomy	NA	1	0	1	0	0	0	0	0	0	0	0	0	0	0	1	1	0	0	0	0	0	0	0	0	1	0	0	0	1	0	infected hematoma causing abdominal abscess, abd wall necrotizing fasciitis
197	2022	Jeon JB	K	77	0	HTN, DM, CAD	CAD s/p CABG	1.6	0	0	1	0	0	0	0	0	0	0	anemia, shock	0	0	0	1	1	0	0	0	0	Pancreaticoduodenal artery aneurysm	1	0	0	1	0	0	0	1	0	0
198	2022	Giri S	India	30	0	Pancreatitis	pancreatitis	3.2	0	0	0	0	0	0	1	0	0	0	0	0	1 (endoscopic ultrasound	0	0	1	0	1	0	0	0	0	0	0	1	0	0	0	1	0	0
199	2022	Alam AS	USA	84	0	HTN	s/p cholecystectomy	9.9	1	1	0	0	0	0	0	1	0	0	dizzi	0	0	0	1	1	0	0	0	0	0	0	0	0	1	0	0	0	1	0	0
200	2022	Pavanan A	India	29	1	Pancreatitis	pancreatitis, duodenal ulcer	9	1	1	0	0	0	0	1	1	1	0	0	0	0	0	1	1	0	0	0	0	0	1	1	0	1	0	0	0	1	0	cerebral infarction
201	2022	Smith ZT	USA	64	1	Pancreatitis	pancreatitis	NA	1	1	0	1	0	0	0	0	0	0	dyspnea	0	0	0	1	1	0	0	0	0	SMA, portal vein thrombosis	1	1	0	1	1 (for SMV and portal vein)	0	0	1	0	0
202	2022	Cardona JD	Colombia	67	0	Kidney cancer with pancreatic metastasis	S/P pancreatectomy, pancreaticogastrostomy, nephrectomy	NA	1	1	0	1	0	0	0	0	0	0	0	0	0	0	1	1	0	0	0	0	0	0	0	0	1	0	0	0	1	0	0
203	2022	Tarar ZI	USA	45	1	Alcohol abuse, hepatitis, HTN	pancreatitis	3	1	1	0	1	0	0	0	0	0	0	0	1	0	0	1	1	1	0	0	0	0	0	0	0	1	0	0	0	1	0	0
204	2022	Ayala D	Colombia	70	1	Pancreatic tumor with hepatic metastasis	pancreatic tumor with hepatic metastasis	NA	1	1	0	1	0	0	0	0	1	0	weight loss	0	0	1	1	1	2	0	1	0	0	1	1	0	2	0	0	0	0 TAE failed once	1	hepatic failure, pulmonary embolism
205	2022	Lee MR	Korea	63	0	0	cholecystitis	2	1	0	0	0	0	0	0	0	0	0	0	0	0	0	1	0	0	0	0	0	0	0	0	1 laparoscopic GDA resection and cholecystectomy	0	0	0	0	1	0	0
206	2022	Lim SG	Korea	39	0	Pancreatitis, alcohol abuse	pancreatitis	4.5	1	0	0	0	0	1	0	1	0	1	0	0	0	0	1	1	0	0	0	0	arterioportal fistula, portal vein stenosis	0	0	0	1	1	0	0	1	0	0
207	2022	Kinoshita K	Japan	74	1	Pancreatic cancer	S/P biliary stent	NA	0	1	1	0	0	0	0	0	0	0	0	0	0	0	1	1	0	0	0	0	0	1	0	0	1	0	0	0	1	0	0
208	2022	*Patel S	India	NA	1	Alcohol abuse	pancreatitis	8.2	1	1	0	0	0	0	1	1	1	0	palpable abdominal mass	0	0	0	1	1	1	0	0	0	GDA aneurysm communicated with common hepatic artery	0	0	0	1	1 (combined with TAE)	0	0	1	0	0
209	2022	Akpo G	Senegal	51	NA	Alcohol abuse	0	1.8	0	0	1	0	0	0	0	0	1	0	0	1	0	0	1	0	0	0	0	0	0	1	0	0	0	0	0	1	0	1	0
210	2022	Abetz JW	Australia	39	1	Pancreatitis, alcohol abuse	S/P a metallic stent drainage for pseudocyst	4.1	0	1	1	0	0	0	0	0	0	0	nausea, syncope	0	0	0	1	1	2	0	0	0	0	1	1	1 duodenotomy	1	0	0	0	0 (surgery failed once)	0	0
211	2023	Miyama A	Japan	66	1	HTN, DM	ampulla cancer S/P endoscopic retrograde biliary drainage	NA	1	1	0	1	0	0	0	1	1	0	0	0	0	1	1	1	1	0	0	0	0	1	1	1 pancreaticoduodenectomy	1	0	0	0	1	0	0
212	2023	Barka M	Tunisia	56	0	Pancreatitis	pancreatitis	5	1	0	1	0	0	0	0	0	1	0	0	0	0	0	1	1	0	0	1	0	hepatic artery pseudoaneurysm	0	0	0	1	0	0	0	1	0	pancreatic pseudocyst with biliary obstruction
213	2023	Fei K	USA	62	0	HTN, DM	S/P laparoscopic cholecystectomy	1.9	1	0	0	0	0	0	0	0	0	0	0	0	0	0	1	1	0	0	1	0	Pancreaticoduodenal artery aneurysm	0	0	1 robotic median arcuate ligament release before TAE	1	0	0	0	1	0	0
214	2023	Yamazaki M	Japan	49	1	Pancreatitis, alcohol abuse	pancreatitis	0.6	1	0	1	0	0	0	0	1	0	0	fever, dyspnea	0	0	0	3	0	0	0	0	0	0	1	1	1 decompressive laparotomy	0	0	0	1	1	0	abdominal compartment syndrome, acute renal failure
215	2023	Zhou YY	Taiwan	76	0	Gastric ulcer	0	8.8	1	0	0	0	0	0	1	0	0	0	fever	0	0	0	1	1	0	0	0	0	0	0	0	0	1	0	0	0	1	0	0
216	2023	Sequeira C	Portugal	75	1	Alcohol abuse, DM, HTN	pancreatitis	NA	1	0	1	0	0	0	0	1	1	0	0	1	0	0	1	1	0	0	0	0	0	1	1	0	1	0	0	0	1	0	0
217	2023	Zhou TT	China	50	1	Esophageal cancer, pancreatitis, alcohol abuse	pancreatitis	2	1	1	0	1	0	0	0	1	0	0	0	0	0	0	1	1	1	0	0	0	0	0	0	0	1	0	0	0	1	0	0
218	2023	Shibata E	Japan	79	1	Pancreatic cancer	subtotal esophagectomy and gastric tube reconstruction (surgical complication), pancreatic ca s/p pancreatectomy	2.6	0	0	0	0	0	0	0	0	0	0	asymptomatic	0	0	0	1	1	0	0	0	0	0	0	0	0	1	0	0	0	1	0	0
219	2023	Ju J(1)	China	83	0	COPD, HTN	0	NA	0	1	0	0	0	0	0	0	0	0	0	0	0	0	0	1	1	0	0	0	0	1	1	0	1	0	0	0	1	0	0
220	2023	Ju J(2)	China	18	1	0	0	NA	0	1	0	0	0	0	0	0	0	0	0	0	0	0	0	1	1	0	0	0	0	1	1	0	1	0	0	0	1	0	0
221	2023	Ju J(3)	China	65	0	HTN	0	1	1	1	0	0	0	0	0	0	0	0	0	0	0	0	1	1	0	1	0	0	0	0	0	0	1	0	0	0	1	0	0
222	2023	Taneja V	India	36	1	DM, HTN, pancreatitis, drug abuse	pancreatitis	NA	1	1	0	0	0	0	0	0	0	0	fever, dyspnea	0	0	1	1	1	0	0	0	0	0	0	0	0	1	0	0	0	1	0	0
223	2023	Ghazanfar H	USA	68	1	HTN, HIV, COPD	gall stone pancreatitis	NA	0	1	1	0	0	0	1	1	0	0	syncope	0	0	0	1	1	0	0	0	0	superior pancreaticoduodenal artery pseudoaneurysms	1	1	0	1	0	0	0	1	0	0
224	2023	Almadwahi N	Yemen	70	1	Duodenal ulcer	0	3.2	1	1	1	0	0	0	0	0	0	0	0	0	0	0	1	0	0	0	0	0	0	1	1	1	0	0	0	0	1	0	0
		Characteristics								Presentation: Hemorrhage to					Obstruction						Diagnostic tools										Treatment						Prognosis
	Year	Author	Nation	Age	Gender	Comorbidity	Predisposing factors	Size (cm)	Abdominal pain	GI	Intra-abdomen/ retroperitoneum	Pancreas	Biliary tract	Vessel	GI	Pancreas/ hyperamylasemia	Biliary tract	Vessel	Other presentation	Non-diagnostic ultrasound	Ultrasound	Non-diagnostic CT	CT	Angiography	Non-diagnostic ensoscopy	Endoscopy	MR	Other images	Additional vascular finding	shock before treatment	Emergent(1) / elective(0) Tx	Surgery	TAE/injection	Stent	Thrombin injection	Observation	successful stop bleeding	In hospital Mortality	Complication
																												ERCP
				221/224	219/224	191/224	161/224	149/224	150/224	119/224	68/224	39	9/224	5/224	25/224	68/224	54/224	3/224		31	40	28	190	202	75	26	17	22	43	78	71	54	168	10	15	6	185	15	36
						0.853	0.719		0.67	0.531	0.304	0.174	0.04	0.022	0.112	0.304	0.241	0.013		0.138	0.179	0.125	0.848	0.902	0.335	0.116	0.076	0.098	0.192	0.348	0.317	0.241	0.75	0.045	0.067	0.027	0.826	0.067	0.161
			mean	54.4	M156/219		mean	3.8												31	41	31	194		85			RBC scintigraphy				non-GAD		non-GAD
			SD	16.8	0.712		SD	2.6																				2				12		5
			median	55			median	3											weight loss 8	accuracy	41/72		194/225			26/111		0.009				0.054		0.022
			Q1	42	0 female		Q1	2											fever 7		0.569		0.862			0.234
			Q3	68	1 male		Q3	5											dyspnea 5
																			syncope 5	0 no use the tool									0 no additional finding	0 no shock	0 elective	0 no treatment					0 fail to stop bleeding	0 died	0 no complication
							0 no predisposing factors		0 no symptoms										asymptomatic 3	1 use the tool										1 shock	1 emergent	1 treatment					1 stop bleeding	1 survived	1 complication
																			back pain 2
																			dizzi 2
																			abdominal mass 2
																			nausea 2
																			skin rash 1
